This manuscript has been submitted for publication elsewhere. Subsequent versions of this manuscript may have different content. Preprints deposited in bioRxiv can be cited using their digital object identifier (DOI).

# Ooids forming *in situ* within microbial mats (Kiritimati atoll, central Pacific)

Pablo Suarez-Gonzalez<sup>1</sup>, Joachim Reitner<sup>2,3</sup>

<sup>1</sup> Departamento de Geodinámica, Estratigrafía y Paleontología, Complutense University of Madrid, C/ José Antonio Novais 12, 28040 Madrid, Spain. <https://orcid.org/0000-0002-2370-5017>  
pablosuarez@ucm.es

<sup>2</sup> Department of Geobiology, Centre of Geosciences of the University of Göttingen Goldschmidtstraße 3, 37077 Göttingen, Germany. <https://orcid.org/0000-0002-6361-3555>

<sup>3</sup> Academy of Science and Humanities, Theater Str. 7, 37073 Göttingen, Germany.

## Abstract

Ooids (subspherical particles with a laminated cortex growing around a nucleus) are ubiquitous in the geological record since the Archean and have been widely studied for more than two centuries. However, various questions about them remain open, particularly about the role of microbial communities and organic matter in their formation and development. Although ooids typically occur rolling around in agitated waters, here we describe for the first time aragonite ooids forming statically within microbial mats from hypersaline ponds of Kiritimati (Kiribati, central Pacific). Subspherical particles had been previously observed in these mats and classified as spherulites, but they grow around autochthonous micritic nuclei, and many of them have laminated cortices, with alternating radial fibrous laminae and micritic laminae. Thus, they are compatible with the definition of ‘oid’ and are in fact identical to many modern and fossil examples. Kiritimati ooids are more abundant and developed in some ponds and in some particular layers of the microbial mats, which has led to the discussion and interpretation of their formation processes as product of mat evolution, through a combination of organic and environmental factors. Radial fibrous laminae are formed during periods of increased

28 supersaturation, either by metabolic or environmental processes. Micritic laminae are formed in  
29 closer association with the mat exopolymer (EPS) matrix, probably during periods of lower  
30 supersaturation and/or stronger EPS degradation. Therefore, this study represents a step forward  
31 in the understanding of ooid development as influenced by microbial communities, providing a  
32 useful analogue for explaining similar fossil ooids.

33

34

35 **Keywords:** ooids, oolites, microbialites, spherulites, EPS, microbial mats.

36

### 37 **Declarations**

38 - **Funding:** This study was funded by a postdoctoral “Humboldt Research Fellowship” of the  
39 Alexander von Humboldt Foundation and by DFG projects FOR 571 and Re 665/18-2.

40

41 - **Conflicts of interest/Competing interests:** The authors declare no conflict of interest

42

43 - **Availability of data and material:** All data used for this research are available in the text and  
44 figures of the manuscript. The material used is available at the Geobiology Department of the  
45 University of Göttingen.

46

47 - **Code availability:** Not applicable

48

49

## 50 **Introduction**

51 Ooids (subspherical particles with a laminated cortex growing around a nucleus, cf.  
52 Richter, 1983a) have fascinated and intrigued humanity for millennia (Burne et al., 2012;  
53 Weber, 2014). Despite being one of the sedimentary particles with the oldest continuous  
54 geological record, since the Archean (e.g. Siah et al., 2017; Flannery et al., 2019) and with the  
55 longest history of descriptions and interpretations, since Roman times (Burne et al., 2012), they  
56 have prompted continuous discussions about their definition, classification, formation  
57 processes, mineralogy, diagenesis and evolution throughout Earth history (see some previous  
58 reviews in Kalkowsky, 1908; Bucher, 1918; Bathurst, 1968; Teichert, 1970; Fabricius, 1977;  
59 Davies et al., 1978; Simone, 1981; Krumbein, 1983; Richter et al., 1983a; Wilkinson et al.,  
60 1985). Some of these discussions are still active nowadays (see a recent review in Diaz and  
61 Eberli, 2019), mainly about determining the exact processes behind the origin and development  
62 of ooids. Being characteristic particles of active shoals in shallow agitated waters, they have  
63 been long considered physicochemical precipitates formed by constant rolling in the water (e.g.  
64 Duguid et al., 2010; Trower et al., 2018). Nevertheless, ooids have an equally long history of  
65 being interpreted as formed by some degree of influence from organic molecules or even  
66 microbial communities (e.g. Kalkowsky, 1908; Mitterer, 1968; Suess and Fütterer, 1972;  
67 Reitner et al., 1997; Diaz et al., 2017; Li et al., 2017; Mariotti et al., 2018). The work presented  
68 here entails a step forward in the knowledge of biotic factors on the origin of ooids, since it  
69 describes in detail for the first time ooids occurring within thick microbial mats of hypersaline  
70 ponds from Kiritimati atoll (Republic of Kiribati, Central Pacific). The aims of the study are to  
71 investigate if the analysed particles are compatible with the definition of ooids and if they grow  
72 directly within the microbial mats, a situation that has previously been only rarely and locally  
73 described (Friedmann et al., 1973; 1985; Krumbein and Cohen, 1974; Krumbein, 1983; Gerdes  
74 et al., 1994; 2000; Hubert et al., 2018), and which is poorly understood. Consequently, this  
75 study will also aim to interpret the biotic and environmental factors that may control ooid  
76 development within microbial mats, providing a useful modern analogue for explaining the

77 origin of fossil ooids, especially of those whose origin is suspected to be related with benthic  
78 microbial communities (e.g. Kalkowsky, 1908; Krumbein, 1983; Neuweiler, 1993; Li et al.,  
79 2017; Antoshkina et al., 2020; Zwicker et al., 2020)

80

## 81 **General setting and materials**

82 Located in the central Pacific and close to the Equator (1°55' N, 157°25' W), the island of  
83 Kiritimati (formerly Christmas Island) is the largest atoll on Earth, with a land surface area of  
84 ~360 km<sup>2</sup>, and the largest island of the Republic of Kiribati (Fig. 1; Valencia, 1977;  
85 Schoonmaker et al., 1985). The surface of the island shows a reticulate pattern made up of ~500  
86 small and very shallow ponds (most of them <1 km wide and <2 m deep, Helfrich et al., 1973;  
87 Valencia, 1977) with salinities ranging from brackish to hypersaline (Fig. 1; Schoonmaker et al.,  
88 1985; Saenger et al., 2006). In most of them, cm- to dm-thick microbial mats develop covering  
89 the pond bottom (Fig. 2; Trichet et al., 2001; Arp et al., 2012; Schneider et al. 2013; Ionescu et  
90 al, 2015). The ponds are surrounded by sparsely vegetated areas of carbonate debris from the  
91 atoll substrate, mainly mollusc and coral fragments (Saenger et al., 2006; Arp et al., 2012).  
92 Kiritimati has an arid climate controlled by the El Niño-Southern Oscillation (ENSO), which  
93 causes significant variations in rainfall, ranging from dry periods with <200 mm annually, to  
94 humid periods with up to 3000 mm annually (Helfrich et al., 1973; Saenger et al., 2006;  
95 Morrison and Woodroffe, 2009; Arp et al., 2012). This contrast between dry and humid periods  
96 causes strong variations in the water level of ponds (up to 2.5 m, Helfrich et al., 1973) and in  
97 their salinities, which can be up to 6 times higher, when comparing general salinity ranges given  
98 by Helfrich et al. (1973) and Schoonmaker et al., (1985). In addition, most ponds are  
99 hydrologically closed systems and differences in water level of up to 1.2 m have been observed  
100 even in immediately adjacent ponds (Helfrich et al., 1973).

101 For this research, microbial mats from three different ponds (Lakes 2, 21 and 22; Fig. 1)  
102 were studied, all of them including abundant and active mineral precipitation. The sample from  
103 Lake 21 was taken from a central area of the pond, at ~1.5 m depth, and corresponds to the

104 photosynthetically active uppermost ~8 cm of an orange- to green-coloured mat with conical  
105 protuberances and pinnacles (Fig. 2a; cf. Arp et al., 2012; Ionescu et al., 2015), whereas samples  
106 from Lakes 2 and 22 correspond to older and brownish microbial mats (~10 cm and ~12 cm  
107 thick, respectively), with flat tops, faint internal colour-layering, and with only the uppermost  
108 layer being photosynthetically active (Fig. 2b, c; cf. Blumenberg et al., 2015; Shen et al. 2018;  
109 2020). The sample of Lake 2 was taken from a central area of the pond, at ~4 m depth  
110 (Blumenberg et al., 2015; Shen et al., 2020), whereas that of Lake 22 was taken from the pond  
111 shore, close to the mouth of a small, dry, ephemeral creek flowing into the pond (Shen et al.,  
112 2018). Previous  $^{14}\text{C}$  dating of the Lakes 2 and 22 mats have provided ages from  $62 \pm 40$  years  
113 BP at the top and  $1,291 \pm 40$  years BP at the bottom (in Lake 22, Shen et al., 2018) and from  $62$   
114  $\pm 40$  years BP at the top and  $1,440 \pm 40$  years BP at the bottom (in Lake 2, Blumenberg et al.,  
115 2015).

116 All studied microbial mats consist predominantly of a gelatinous organic matrix (mainly  
117 formed by the exopolymers -EPS- secreted by the microbes) with mineral particles within it  
118 (Fig. 2b, c). Consistency and thickness of the organic matrix, as well as the amount of mineral  
119 precipitates varies through each mat and between different mats. Typically, upper layers of the  
120 mats show an abundant, fresh, and firm gelatinous matrix, with few minerals, whereas lower  
121 layers of the mats are crumblier due to less abundant and more degraded organic matrix and to  
122 larger and more abundant mineral precipitates (Fig. 2c). Nevertheless, local variations in  
123 mineral abundance, not following the downwards increase, are also observed between adjacent  
124 mat layers (Fig. 2b). The mineralogy of the precipitates is mainly aragonite, with gypsum  
125 occurring in some layers of the mats, typically at the top, and with minor traces of Mg-calcite,  
126 halite and protodolomite (Arp et al., 2012; Suarez-Gonzalez et al., 2017; Ionescu et al 2015;  
127 Shen et al., 2020). Two main types of aragonitic mineral precipitates occur within the mats:  
128 micritic aggregates and subspherical particles, which are the focus of this study and will be  
129 described in detail below. The micritic aggregates have a micropeloidal texture and range from  
130 mm-scale irregular aggregates in the upper parts of the mats, to cm-scale lumps with reticular

131 structure downwards in the mats (Défarge et al., 1996; Trichet et al., 2001; Arp et al., 2012,  
132 Suarez-Gonzalez et al., 2017). Similarly, subspherical particles are typically smaller and less  
133 abundant in the upper parts of the mats, and larger and more abundant downwards, commonly  
134 coalescing with each other through micritic patches and bridges (Arp et al., 2012; Schneider et  
135 al., 2013; Suarez-Gonzalez et al., 2017).

136

## 137 **Methods**

138         Sampling was conducted in 2011 and all samples were kept at -20°C until laboratory  
139 preparation. From each mat, several correlative adjacent histological thin sections were prepared  
140 covering the whole mat thickness. Samples were dehydrated with graded ethanol and embedded  
141 in LR White resin (London Resin Company Ltd., Reading, UK). Embedded samples were cut to  
142 a ~100 µm thickness using a microtome saw (Leica SP1600) and mounted on glass slides with  
143 Biomount mountant (Electron Microscopy Sciences, Hatfield, PA). Thin sections were observed  
144 under petrographic (Zeiss Axiolab) and fluorescence (Zeiss Axio Imager Z1) microscopes. In  
145 addition, mineral particles were separated from their organic matrix for their study in the  
146 electron microscope. Organic matter of the samples was oxidized with 6% NaOCl, changing the  
147 solution every 12 h (Mikutta et al., 2005) until traces of organic matter were no longer visible.  
148 Mineral particles were washed with distilled H<sub>2</sub>O until neutral pH was reached, and then dried.  
149 Some of the subspherical particles focus of this study were mechanically broken to observe their  
150 internal structure. The particles were sputtered with Pt/Pd (14.1 nm for 5 min) and observed in a  
151 field-emission scanning electron microscope (FE-SEM) Leica EM QSG100, using a detector of  
152 secondary electrons (SE2) at a voltage from 2 to 4 kV, combined with an INCA X-act energy  
153 dispersive X-ray (EDX) spectroscope (Oxford Instruments). Some histological thin sections  
154 were also studied with SEM and they were previously etched by submerging them for 10-30  
155 seconds in a 5% EDTA (ethylenediaminetetraacetic acid) solution, for a better observation of  
156 the internal structure of mineral particles.

157

## 158 **Note on terminology**

159         The scientific literature about subspherical carbonate particles and coated grains dates  
160 back for more than a century, with ongoing discussions and contrasting definitions (e.g. Peryt,  
161 1983; Richter, 1983a; 1983b). Therefore, it is advisable to specify beforehand the classifications  
162 and definitions that will be used in this study. The main terms that will be applied to the  
163 subspherical particles studied are ‘spherulites’ and ‘ooids’. A general crystallographic approach  
164 to ‘spherulites’ defines them as “radially polycrystalline aggregates with an outer spherical  
165 envelope” (Shtukenberg et al., 2012), whereas geological points of view emphasize their “radial  
166 internal structure arranged around one or more centers” and the fact that they are “formed in a  
167 sedimentary rock in the place where [they are] now found” (Bates and Jackson, 1980, in  
168 Verrechia et al., 1995). Concerning ‘ooids’, also a purely descriptive definition is adopted,  
169 following Richter (1983a), who emphasizes that they are subspherical particles “formed by a  
170 cortex and a nucleus variable in composition and size”, where “the cortex is smoothly  
171 laminated” with laminae typically concentric. Therefore, the main difference between both  
172 types of subspherical particles is that unlike spherulites, ooids grow around a nucleus and show  
173 internal lamination. Although ‘spherulites’ and ‘ooids’ may also be envisaged as end-members  
174 of a gradational continuum and, in fact, intermediate steps between them do occur (e.g.  
175 Friedmann et al., 1973; Kahle, 1974), their two clearly different descriptive definitions are  
176 adopted here, for avoiding confusions between them, as well as genetic implications.

177

## 178 **Description of subspherical particles**

179         Subspherical particles have been observed in the three studied microbial mats, although  
180 with different features and abundances between them and between each mat layer. In general,  
181 they range from spherical to ellipsoidal in shape, and from 0.1 to 3 mm wide (Figs. 3-8). Their  
182 outer surface is smooth, as seen with a hand lens (Fig. 3a, b), but SEM imaging reveals that it is

183 irregular in detail, often pitted (Fig. 3c-e). In addition, botryoidal or domal overgrowths that  
184 cover only partially the particle surface are also observed (Fig. 3d-e, 5). Subspherical particles  
185 occur throughout the microbial mats, but they are typically larger and more abundant  
186 downwards, although significant differences in their abundance are observed between adjacent  
187 mat layers (Figs. 2b, c, 4). In the young and fresh mat of Lake 21 only very small subspherical  
188 particles occur (Figs. 3c, d, 5c), whereas larger ones are observed in the thicker and older mats  
189 of Lakes 2 and 22 (Figs. 3a, b, d, 4, 6), especially in their lower parts, where some subspherical  
190 particles are merged together forming irregular aggregates up to several centimeters long (Fig.  
191 3b).

192         The internal structure of the subspherical particles consists of a nucleus and a cortex. The  
193 nuclei are always irregular micritic aggregates with micropeloidal texture, identical to the  
194 micritic aggregates that precipitate throughout the Kiritimati microbial mats (Figs. 4-6). SEM  
195 imaging shows that the nuclei consist of nm-scale aragonite crystals oriented randomly or  
196 forming  $\mu\text{m}$ -scale spherules, and with abundant EPS fibers and sheets between them and even  
197 some calcified microbe remains (Figs. 7, 8). The cortices of the particles have a radial fibrous  
198 structure formed by long and thin aragonite crystals, and some of the cortices have internal  
199 lamination and others do not (Figs. 5-8). The subspherical particles with laminated cortices are  
200 thus classifiable as ooids (*sensu* Richter, 1983a). Those with non-laminated cortices are thus  
201 closer to the definition of spherulites (*sensu* Bates and Jackson, 1980, in Verrechia et al., 1995),  
202 with the particularity that they do not grow around a “center” but around a micritic nucleus.  
203 Although subspherical particles occur throughout all the studied mats, those with well-  
204 developed laminated cortices seem to be especially abundant in particular layers (Fig. 4),  
205 typically at the lower and older parts of mats of Lakes 2 and 22, being absent from the mat of  
206 Lake 21.

207         In the particles with laminated cortices, their lamination is caused by thin micritic  
208 laminae that periodically interrupt the fibrous radial aragonite growth (Figs. 5-7). The thickness  
209 of micritic laminae is laterally variable, but they are typically only a few  $\mu\text{m}$  thick, locally  
210 reaching 60  $\mu\text{m}$  (Figs. 5-8). Micritic laminae consistently show a stronger fluorescence than the



211 adjacent fibrous radial laminae (Fig. 5b, d). Locally, micritic laminae occur not within the  
212 cortices, bounded by fibrous radial laminae, but at the external surface of subspherical particles,  
213 covering them partially or completely as their youngest lamina, and being associated with the  
214 EPS matrix that surrounds the particles (Fig. 5c, d, f, 8a, b). Contrasting with the long and  
215 radially oriented aragonite crystals of the fibrous radial laminae, the micritic laminae consist of  
216 nm-size aragonite crystals oriented randomly and with abundant EPS between them (Figs. 7c-f,  
217 8a, b). In some particles, a finer lamination is also observed within the fibrous radial laminae,  
218 which are subdivided in 0.5-2  $\mu\text{m}$  thick laminae that do not seem to interrupt the continuous  
219 growth of the aragonite crystals (Fig. 7c, d).

220         Regardless of whether they are internally laminated or not, most cortices of subspherical  
221 particles show dark inclusions up to 30  $\mu\text{m}$  wide with strong fluorescence (Fig. 6a-e). These  
222 inclusions are cavities within the particle cortex, which include abundant EPS and some  
223 calcified microbe remains (Figs. 7, 8). In addition, calcified microbe remains, mainly  
224 filamentous bacteria and diatoms, are also locally observed enclosed by the fibrous aragonite  
225 crystals of the cortices and outside of the dark inclusions, especially in particles of the Lake 2  
226 mat (Figs. 6e, 8e).

227

## 228 **Discussion**

### 229 ***In situ* growth of ooids within microbial mats**

230         Although subspherical particles of the Kiritimati microbial mats have been previously  
231 referred to as ‘spherulites’ (Défarge et al., 1996; Arp et al., 2012; Schneider et al., 2013; Ionescu  
232 et al., 2015) or ‘spherules’ (Schmitt et al., 2019; Chen et al., 2020), the detailed description  
233 presented here shows that some of the subspherical particles fit perfectly the definition of  
234 ‘ooids’ (Richter, 1983a), as they are composed of a laminated cortex growing around a nucleus.  
235 Those with non-laminated cortices might be classed as ‘spherulites with nucleus’ or ‘non-  
236 laminated ooids’ and are equivalent to other examples of modern ooids with non-laminated

237 cortices, such as some ooids from Great Salt Lake (Eardley, 1938; Kahle, 1974; Reitner et al.,  
238 1997; Chidsey et al., 2015).

239       Independently of their terminological classification, the features of both the ooids *sensu*  
240 *stricto* and the non-laminated ooids, indicate that they were formed and developed directly  
241 within the studied microbial mats. Firstly, no equivalent particles have been observed, nor  
242 previously described, in or around the ponds of Kiritimati (Saenger et al., 2006; Arp et al.,  
243 2012) and, thus, they cannot be allochthonous particles transported to and trapped within the  
244 microbial mats of the ponds (cf. Suarez-Gonzalez et al., 2019). In addition, the subspherical  
245 particles grow around EPS-rich irregular micritic aggregates identical to the micritic aggregates  
246 that precipitate throughout the Kiritimati microbial mats (Figs. 4-8; Défarge et al., 1996; Trichet  
247 et al., 2001; Arp et al., 2012, Suarez-Gonzalez et al., 2017). Similarly, micritic laminae of the  
248 ooids show high fluorescence, due to their content in EPS (Fig. 6b, d), and both ooids and non-  
249 laminated ooids include abundant EPS-rich cavities and calcified microbe remains (Figs. 6e, 7,  
250 8), all of them likely enclosed within the mineral structure during *in situ* growth of their  
251 cortices. The fact that ooids at different developmental stages occur within the mats, from ooids  
252 with incipient micritic laminae forming around them (Figs. 5, 8a, b) to fully-developed  
253 laminated ooids (Fig. 6, 7), which even coalesce with each other in their growth (Figs. 3b, 4,  
254 5e), further supports their *in situ* origin. Other examples of ooids, very similar to those of  
255 Kiritimati, have been also described in microbial mats from shallow hypersaline settings and  
256 interpreted as formed *in situ* within the mats (Friedmann et al., 1973; 1985; Krumbein and  
257 Cohen, 1974; Krumbein, 1983; Gerdes et al., 1994; 2000; Hubert et al., 2018).

258

### 259 **Processes of ooid formation and development within microbial mats**

260       The *in situ* growth of the Kiritimati ooids prompts evaluating the conditions that underlie  
261 their formation and the processes that allow their continuing development. Previous works  
262 studying the so-called ‘spherulites’ of Kiritimati (Défarge et al., 1996; Arp et al., 2012), have  
263 highlighted their recent occurrence already at the youngest photosynthetically active layer of the  
264 mats, together with their intimate association with the fresh EPS matrix of these layers, and their

265 very positive  $\delta^{13}\text{C}$  values. These features have led to interpret them as early precipitates of the  
266 mats, formed through the combination of high aragonite supersaturation, caused by intense  
267 photosynthesis, and efficient inhibition of precipitation by pristine EPS (Arp et al., 2012). This  
268 combination of factors produces that radial fibrous aragonite precipitates only at few spots  
269 where inhibition is overcome and nucleation points exist, i.e. around preexisting micritic  
270 carbonate nuclei. This plausible explanation accounts, however, only for the first radial fibrous  
271 lamina of the particle cortex, not for the successive alternation of radial fibrous and micritic  
272 laminae that forms the characteristic lamination of the ooids described here. In other examples  
273 of ooids growing within hypersaline microbial mats, their lamination has been explained as  
274 caused by biologically induced chemical changes within microenvironments of the mat, which  
275 produce alternation of EPS-rich dark laminae and lighter fibrous aragonite laminae (Gerdes et  
276 al., 1994).

277         In the case of the Kiritimati ooids, the fact that their abundance and development vary not  
278 only in different layers of the same mat but also between mats of different ponds (Figs. 2-4),  
279 suggests that besides the biological influence, probably also environmental factors are involved  
280 in ooid development. The young and photosynthetically active mat of Lake 21 includes only  
281 small non-laminated ooids with a single radial fibrous aragonite lamina (Fig. 5), in agreement  
282 with the interpretation of Arp et al. (2012) of photosynthesis-induced high supersaturation  
283 coupled with strong EPS inhibition of precipitation. The older and more layered mats of Lakes 2  
284 and 22 contain laminated ooids, which are generally larger and more abundant downwards,  
285 indicating that the lamination caused by alternation of radial fibrous laminae and micritic  
286 laminae is developed during the burial of older mat layers under overlying younger ones. The  
287 fact that radial fibrous laminae include EPS-filled cavities and microbe molds enclosed by the  
288 aragonite crystals (Figs. 6e, 7, 8) suggests that the precipitation of these laminae may have been  
289 relatively rapid and episodic, entombing mat remains that are very well preserved. This is  
290 consistent with the interpretation of precipitation occurring only locally and occasionally when  
291 very high supersaturation overcomes strong inhibition by fresh EPS. On the other hand, micritic  
292 laminae observed forming at the outer surface of ooids are intimately associated with the EPS

293 surrounding the ooid (Figs. 5, 8a, b), and micritic laminae within the ooid cortices include EPS  
294 remains between the aragonite crystals (Fig. 7d, f). These facts indicate that the precipitation of  
295 micritic laminae is more directly and strongly controlled by the EPS matrix of the mat, which  
296 likely caused a slower precipitation of more abundant but much smaller and irregularly oriented  
297 aragonite crystals (as compared to the radial fibrous laminae), probably triggered by lower  
298 supersaturation and/or weaker inhibition due to increasing degradation of EPS with burial (cf.  
299 Trichet and Défarge, 1995; Reitner et al., 1995; Baumgartner et al., 2006; Arp et al., 2012).

300         The repeated alternation of radial fibrous and micritic laminae that forms ooid cortices  
301 indicates that both precipitation mechanisms interpreted above (rapid fibrous radial precipitation  
302 and slower and more EPS-controlled micrite precipitation) alternated successively in the same  
303 space. Since back-and-forth variations on EPS inhibition of precipitation are unlikely because  
304 decreasing inhibition is due to the progressive degradation of EPS with burial, it is more  
305 plausible that the alternation of both precipitation mechanisms is driven by variations in  
306 aragonite supersaturation within the mat microenvironment. Such variations can be caused by  
307 biotically-influenced changes within the mat and/or by changes in the overall pond  
308 hydrochemistry. The case of the Lake 22 is particularly relevant, because it includes the most  
309 abundant ooids with well-developed laminated cortices, and because these are especially  
310 concentrated in one particular layer at the lower middle part of the mat (Figs. 2, 4).  
311 Interestingly, the ooid-rich layer also shows a marked difference in the EPS matrix, when  
312 compared with the matrices of its adjacent layers, which are very birefringent under crossed-  
313 polarized light (Fig. 4). This birefringence is caused by a significant sugar-rich EPS degradation  
314 (Arp et al., 1998; 1999; Reitner et al., 2005), and thus the EPS matrix of the ooid-rich layer  
315 seems to be less degraded than the layers above and below, which include abundant irregular  
316 micritic aggregates but hardly any ooids (Fig. 4). This points to a probable relationship between  
317 the development of ooids and a stronger inhibition effect due to less degraded EPS. In addition,  
318 the mat of Lake 22 differs from the others in that it was sampled at the shore of the pond and by  
319 a small dried ephemeral creek, thus being more susceptible to hydrochemical variations, either  
320 due to changes in pond level or by water input from the creek. In fact, the ENSO-controlled

321 variations in rainfall cause significant salinity changes in hypersaline ponds of Kiritimati (see  
322 'General setting and materials' section, above), and in particular in Lake 22, which shows the  
323 strongest salinity variation (+118‰) in the period from 2002 (132‰, Arp et al., 2012) to 2011  
324 (250‰, Shen et al., 2018), if compared with Lake 2 (+28‰; Saenger et al., 2006; Arp et al.,  
325 2012; Shen et al., 2020) and even with the immediately adjacent lake 21 (+57‰; Saenger et al.,  
326 2006; Arp et al., 2012; Ionescu et al., 2015).

327

## 328 **Concluding remarks and implications**

329 In summary, the formation mechanism of the Kiritimati microbial mat ooids is interpreted  
330 here as product of long-term (~1000 year-scale) mat evolution, especially of certain layers,  
331 through a combination of: a) a not too advanced EPS degradation that allows some degree of  
332 inhibition of precipitation, hindering or slowing micrite formation (cf. Arp et al., 2012); and b)  
333 periodic and significant variations in supersaturation within the mat microenvironment,  
334 probably triggered by climate-driven hydrochemical changes in the hypersaline pond, although  
335 metabolic changes are also likely to influence local microenvironmental variations during the  
336 burial evolution of particular mat layers. Future work on environmental and microbiological  
337 monitoring of Kiritimati mats or other similar examples, and laboratory experiments replicating  
338 these conditions could further refine this interpretation. Nonetheless, this first description of the  
339 Kiritimati ooids provides definitive proof that ooids can grow statically within benthic microbial  
340 mats, controlled both by biological and environmental factors, a mechanism rarely described  
341 (Friedmann et al., 1973; Krumbein, 1983; Gerdes et al., 1994) and poorly clarified. Thus, this  
342 study means a significant step forward in the understanding of ooids not merely as  
343 physicochemical precipitates, but as particles whose growing mechanism is at least influenced,  
344 if not directly controlled, by biotic factors (see a recent review and discussion in Diaz and  
345 Eberli, 2019), a hypothesis with increasing evidence that supports it not only from hypersaline  
346 environments, but also from freshwater settings (e.g. Wilkinson et al., 1980; Plee et al., 2008;  
347 Paction et al., 2012), normal marine waters (e.g. Diaz et al., 2017; Batchelor et al., 2018;

348 Mariotti et al., 2018) and even from laboratory experiments (e.g. Brehm et al., 2004; 2006).  
349 Finally, the Kiritimati ooids demonstrate that care must be taken when interpreting the origin of  
350 fossil ooids, one of the oldest (e.g. Siahi et al., 2017; Flannery et al., 2019) and most extensively  
351 studied particles of the geological record, providing a modern analogue that will prove useful in  
352 explaining fossil ooids with features compatible with an origin associated with benthic  
353 microbial communities (e.g. Kalkowsky, 1908; Krumbein, 1983; Neuweiler, 1993; Li et al.,  
354 2017; Antoshkina et al., 2020; Zwicker et al., 2020).

355

### 356 **Acknowledgements**

357 This study was funded by a by a postdoctoral “Humboldt Research Fellowship” of the  
358 Alexander von Humboldt Foundation. Previous field expeditions and studies were funded by  
359 DFG projects FOR 571 (Geobiology of Biofilms) and Re 665/18-2 (Evolution of  
360 Biomineralisation). Technical assistance was expertly provided by Dorothea Hause-Reitner with  
361 the electron microscope, and by Birgit Röring, Wolfgang Dröse and Axel Hackmann with the  
362 laboratory preparation of samples.

363

364 **References**

- 365 Antoshkina, A.I., E.A. Zhegallo, and S.I. Isaenko. 2020. Microbially mediated  
366 organomineralization in Paleozoic carbonate ooids. *Paleontological Journal* 54: 825–834.  
367 <https://doi.org/10.1134/S003103012008002X>.
- 368 Arp, G., J. Hofmann, and J. Reitner. 1998. Microbial Fabric Formation in Spring Mounds  
369 ("Microbialites") of Alkaline Salt Lakes in the Badain Jaran Sand Sea, PR China. *PALAIOS*  
370 13: 581–592, <https://doi.org/10.2307/3515349>.
- 371 Arp, G., A. Reimer, and J. Reitner. 1999. Calcification in cyanobacterial biofilms of alkaline  
372 salt lakes, *European Journal of Phycology* 34: 393–403,  
373 <https://doi.org/10.1080/09670269910001736452>.
- 374 Arp, G., G. Helms, K. Karlinska, G. Schumann, A. Reimer, J. Reitner, and J. Trichet. 2012.  
375 Photosynthesis versus Exopolymer Degradation in the Formation of Microbialites on the  
376 Atoll of Kiritimati, Republic of Kiribati, Central Pacific. *Geomicrobiology Journal* 29: 29–  
377 65, <https://doi.org/10.1080/01490451.2010.521436>, 2012.
- 378 Bates, R.L., and J.A. Jackson. 1980. *Glossary of Geology*, 2<sup>nd</sup> edition. Falls Church, Virginia:  
379 American Geological Institute.
- 380 Bathurst, R.G.C. 1968. Precipitation of ooids and other aragonite fabrics in warm seas. In  
381 *Recent Developments in Carbonate Sedimentology in Central Europe*, ed. G. Muller and  
382 G.M. Friedman, pp. 1-10. Springer, Berlin.
- 383 Baumgartner, L.K., R.P. Reid, C. Dupraz, A.W. Decho, D.H. Buckley, J.R. Spear, K.M.  
384 Przekop, and P.T. Visscher. 2006. Sulfate reducing bacteria in microbial mats: changing  
385 paradigms, new discoveries. *Sedimentary Geology* 185: 131–145.  
386 <https://doi.org/10.1016/j.sedgeo.2005.12.008>
- 387 Blumenberg, M., V. Thiel, and J. Reitner. 2015. Organic matter preservation in the carbonate  
388 matrix of a recent microbial mat – Is there a ‘mat seal effect’? *Organic Geochemistry* 87:  
389 25–34, <https://doi.org/10.1016/j.orggeochem.2015.07.005>.

- 390 Brehm, U., K.A. Palinska, and W.E. Krumbein. 2004. Laboratory cultures of calcifying  
391 biomicrospheres generate ooids - A contribution to the origin of oolites. *Carnets de Géologie*  
392 / *Notebooks on Geology*, Letter 2004/03. [http://paleopolis.rediris.es/cg\\_archives/04L03/](http://paleopolis.rediris.es/cg_archives/04L03/)
- 393 Brehm, U., W.E. Krumbein, and K.A. Palinska. 2006. Biomicrospheres Generate Ooids in the  
394 Laboratory. *Geomicrobiology Journal* 23: 545–550.  
395 <https://doi.org/10.1080/01490450600897302>.
- 396 Bucher, W.H. 1918. On oörites and spherulites. *The Journal of Geology* 26: 583–609.  
397 <https://doi.org/10.1086/622622>
- 398 Burne, R.V., J.C. Eade, and J. Paul. 2012. The Natural History of Ooliths: Franz Ernst  
399 Brückmann’s Treatise of 1721 and its Significance for the Understanding of Oolites.  
400 *Hallesches Jahrbuch für Geowissenschaften* 34: 93–114.
- 401 Chen, M., Conroy, J.L., and Fouke, B.W. 2020. The distribution of organic matter in aragonite  
402 spherules: Insights into potential biotic mechanisms of spherule formation. *GSA Abstracts*  
403 *with Programs* 52 (6), Paper No. 214-7. <https://doi.org/10.1130/abs/2020AM-353002>.
- 404 Chidsey, T.C., M.D. Vanden Berg, and D.E. Eby. 2015. Petrography and characterization of  
405 microbial carbonates and associated facies from modern Great Salt Lake and Uinta Basin’s  
406 Eocene Green River Formation in Utah, USA. In *Microbial Carbonates in Space and Time*,  
407 ed. D.W.J. Bosence et al., 261–286. Geological Society of London, Special Publication 418.
- 408 Davies, P.J., B. Bubela, and J. Ferguson. 1978. The formation of ooids. *Sedimentology* 25: 703-  
409 730. <https://doi.org/10.1111/j.1365-3091.1978.tb00326.x>
- 410 Défarge, C., J. Trichet, A.M. Jaunet, M. Robert, J. Tribble, and F.J. Sansone. 1996. Texture of  
411 microbial sediments revealed by cryo-scanning electron microscopy. *Journal of Sedimentary*  
412 *Research* 66: 935–947. <https://doi.org/10.1306/D4268446-2B26-11D7-8648000102C1865D>.
- 413 Diaz, M.R., and G.P. Eberli. 2019. Decoding the mechanism of formation in marine ooids: A  
414 review. *Earth-Science Reviews* 190: 536–556.  
415 <https://doi.org/10.1016/j.earscirev.2018.12.016>



- 416 Diaz, M.R., G.P. Eberli, P. Blackwelder, B. Phillips, and P.K. Swart. 2017. Microbially  
417 mediated organomineralization in the formation of ooids. *Geology* 45: 771–774.  
418 <https://doi.org/10.1130/G39159.1>.
- 419 Duguid, S.M.A., T.K. Kyser, N.P. James, and E.C. Rankey. 2010. Microbes and ooids. *Journal*  
420 *of Sedimentary Research* 80: 236–251. <https://doi.org/10.2110/jsr.2010.027>.
- 421 Eardley, A.J. 1938. Sediments of Great Salt Lake, Utah. *AAPG Bulletin* 22: 1305–1411.
- 422 Fabricius, F.H. 1977. Origin of marine ooids and grapestones. *Contributions to Sedimentology*  
423 7: 113 pp.
- 424 Flannery, D.T., A.C. Allwood, R. Hodyss, R.E. Summons, M. Tuite, M.R. Walter, and K.H.  
425 Williford. 2019. Microbially influenced formation of Neoproterozoic ooids. *Geobiology* 17:  
426 151–160. <https://doi.org/10.1111/gbi.12321>.
- 427 Friedmann, G.M., A.J. Amiel, M. Braun, and D.S. Miller. 1973. Generation of carbonate  
428 particles and laminites in algal mats – Example from sea-marginal hypersaline pool, Gulf of  
429 Aqaba, Red Sea. *AAPG Bulletin* 57: 541–557. [https://doi.org/10.1306/819A4302-16C5-  
430 11D7-8645000102C1865D](https://doi.org/10.1306/819A4302-16C5-11D7-8645000102C1865D)
- 431 Friedmann, G.M., A. Sneh, and R.W. Owen. 1985. The Ras Muhammad Pool: Implications for  
432 the Gavish Sabkha. In *Hypersaline Ecosystems - The Gavish Sabkha*, eds. W.E. Krumbein  
433 and G.M. Friedman, 218–237. Springer-Verlag, Berlin.
- 434 Gerdes, G., K. Dunajtschik-Piewak, H. Riege, A.G. Taher, W.E. Krumbein, and H.E. Reineck.  
435 Structural diversity of biogenic carbonate particles in microbial mats. *Sedimentology* 41:  
436 1273–1294. <https://doi.org/10.1111/j.1365-3091.1994.tb01453.x>
- 437 Gerdes, G., W.E. Krumbein, and N. Noffke. 2000. Evaporite microbial sediments. In *Microbial*  
438 *Sediments*, eds. R.E. Riding and S.M. Awramik, 196–208. Springer-Verlag, Berlin.  
439 [https://doi.org/10.1007/978-3-662-04036-2\\_22](https://doi.org/10.1007/978-3-662-04036-2_22).
- 440 Helfrich, P., J. Ball, A. Berger, P. Bienfang, S.A. Cattell, N. Foster, G. Fredholm, B. Gallagher,  
441 E. Guinther, G. Krasnick, M. Rakowicz, and M. Valencia. 1973. The feasibility of brine  
442 shrimp production on Christmas Island. *Sea Grant Technical Report* UNIHI-SEAGRANT-  
443 TR-73-02, 173 pp.

- 444 Hubert, H.L., E.C. Rankey, and C. Omelon. 2018. Organic matter, textures, and pore attributes  
445 of hypersaline lacustrine microbial deposits (Holocene, Bahamas). *Journal of Sedimentary*  
446 *Research* 88: 827–849. <http://dx.doi.org/10.2110/jsr.2018.42>
- 447 Ionescu, D., S. Spitzer, A. Reimer, D. Schneider, R. Daniel, J. Reitner, D. de Beer, and G. Arp.  
448 2015. Calcium dynamics in microbialite-forming exopolymer-rich mats on the atoll of  
449 Kiritimati, Republic of Kiribati, Central Pacific. *Geobiology* 13: 170–180,  
450 <https://doi.org/10.1111/gbi.12120>.
- 451 Kahle, C.F. 1974. Ooids from Great Salt Lake, Utah, as an analogue for the genesis and  
452 diagenesis of ooids in marine limestones. *Journal of Sedimentary Petrology* 44: 30–39.  
453 <https://doi.org/10.1306/74D7296E-2B21-11D7-8648000102C1865D>
- 454 Kalkowsky, E. 1908. Oolith und Stromatolith im norddeutschen Buntsandstein. *Zeitschrift der*  
455 *Deutschen Geologischen Gesellschaft* 60: 68–125.
- 456 Krumbein, W.E. 1983. Stromatolites – The challenge of a term in space and time. *Precambrian*  
457 *Research* 20: 493–531. [https://doi.org/10.1016/0301-9268\(83\)90087-6](https://doi.org/10.1016/0301-9268(83)90087-6)
- 458 Krumbein, W.E., and Y. Cohen. 1974. Biogene, klastische und evaporitische Sedimentation in  
459 einem mesothermen monomiktischen ufernahen See (Golf von Aqaba). *Geologische*  
460 *Rundschau* 63: 1035–1065. <https://doi.org/10.1007/BF01821322>
- 461 Li, F., J. Yan, R.V. Burne, Z.Q. Chen, T.J. Algeo, W. Zhang, L. Tian, Y. Gan, K. Liu, and S.  
462 Xie. 2017. Paleo-seawater REE compositions and microbial signatures preserved in laminae  
463 of Lower Triassic ooids. *Palaeogeography, Palaeoclimatology, Palaeoecology* 486: 96–107.  
464 <https://doi.org/10.1016/j.palaeo.2017.04.005>
- 465 Mariotti, G., S.B. Pruss, R.E. Summons, S.A. Newman, and T. Bosak. 2018. Contribution of  
466 Benthic Processes to the Growth of Ooids on a Low-Energy Shore in Cat Island, The  
467 Bahamas. *Minerals* 8: 252. <https://doi.org/10.3390/min8060252>.
- 468 Mikutta, R., M. Kleber, K. Kaiser, and R. Jahn. 2005. Review: Organic matter removal from  
469 soils using hydrogen peroxide, sodium hypochlorite, and disodium peroxodisulfate, *Soil*  
470 *Science Society of America* 69: 120–135, <https://doi.org/10.2136/sssaj2005.0120>.

- 471 Mitterer, R.M. 1968. Amino acid composition of organic matrix in calcareous oolites. *Science*  
472 162: 1498–1499. <https://doi.org/10.1126/science.162.3861.1498>
- 473 Morrison, R.J., and C.D. Woodroffe. 2009. The soils of Kiritimati (Christmas) Island, Kiribati,  
474 Central Pacific: New information and comparison with previous studies. *Pacific Science* 60:  
475 397–411. <https://doi.org/10.2984/049.063.0308>
- 476 Neuweiler, F. 1993. Development of Albian microbialites and microbialite reefs at marginal  
477 platform areas of the Vasco-Cantabrian Basin (Soba Reef area, Cantabria, N. Spain). *Facies*  
478 29: 213–250. <https://doi.org/10.1007/BF02536930>
- 479 Pacton, M., D. Ariztegui, D. Wacey, M.R. Kilburn, C. Rollion-Bard, R. Farah, and C.  
480 Vasconcelos. 2012. Going nano: A new step toward understanding the processes governing  
481 freshwater ooid formation. *Geology* 40: 547–550. <https://doi.org/10.1130/G32846.1>.
- 482 Peryt, T.M. 1983. Classification of coated grains. In *Coated Grains*, ed. T.M. Peryt, 3–6. Berlin:  
483 Springer-Verlag.
- 484 Plee, K., D. Ariztegui, R. Martin, and E. Davaud. 2008. Unravelling the microbial role in ooid  
485 formation – results of an in situ experiment in modern freshwater Lake Geneva in  
486 Switzerland. *Geobiology* 6: 341–350. <https://doi.org/10.1111/j.1472-4669.2007.00140.x>.
- 487 Reitner, J., P. Gautret, F. Marin, F. Neuweiler. 1995. Automicrocrites in a modern marine  
488 microbialite. Formation model via organic matrices (Lizard Island, Great Barrier Reef,  
489 Australia). *Bulletin de l'Institut Océanographique, Monaco* 14: 237– 263.
- 490 Reitner, J., G. Arp, V. Thiel, P. Gautret, U. Galling, and W. Michaelis. 1997. Organic matter in  
491 Great Salt Lake ooids (Utah, USA) – First approach to a formation via organic matrices.  
492 *Facies* 36: 210–219.
- 493 Reitner, J., J. Peckmann, M. Blumenberg, W. Michaelis, A. Reimer, and V. Thiel. 2005.  
494 Concretionary methane-seep carbonates and associated microbial communities in Black Sea  
495 sediments. *Palaeogeography, Palaeoclimatology, Palaeoecology* 227: 18–30.  
496 <https://doi.org/10.1016/j.palaeo.2005.04.033>
- 497 Richter, D.K. 1983a. Calcareous ooids: A synopsis. In *Coated Grains*, ed. T.M. Peryt, 71–99.  
498 Berlin: Springer-Verlag.

- 499 Richter, D.K. 1983b. Classification of coated grains: Discussion. In *Coated Grains*, ed. T.M.  
500 Peryt, 7–8. Berlin: Springer-Verlag.
- 501 Sachs, J.P., D. Sachse, R.H. Smittenberg, Z. Zhang, D.S. Battisti, and S. Golubic. 2009.  
502 Southward movement of the Pacific intertropical convergence zone AD 1400-1850. *Nature*  
503 *Geoscience* 2: 519–525. <https://doi.org/10.1038/ngeo554>
- 504 Saenger, C., M. Miller, R.H. Smittenberg, and J.P. Sachs. 2006. A physico-chemical survey of  
505 inland lakes and saline ponds: Christmas Island (Kiritimati) and Washington (Teraina)  
506 Islands, Republic of Kiribati. *Saline Systems* 2: 1–15. [https://doi.org/10.1186/1746-1448-2-](https://doi.org/10.1186/1746-1448-2-8)  
507 8, 2006.
- 508 Schmitt, S., J.L. Conroy, T.M. Flynn, R.A. Sanford, M.C. Higley, M. Chen, and B.W. Fouke.  
509 2019. Salinity, microbe and carbonate mineral relationships in brackish and hypersaline lake  
510 sediments: A case study from the tropical Pacific coral atoll of Kiritimati. *The Depositional*  
511 *Record* 5: 212–229. <https://doi.org/10.1002/dep2.71>.
- 512 Schneider, D., G. Arp, A. Reimer, J. Reitner, and R. Daniel. 2013. Phylogenetic analysis of a  
513 microbialite-forming microbial mat from a hypersaline lake of the Kiritimati Atoll, Central  
514 Pacific. *PLoS ONE* 8: e66662. <https://doi.org/10.1371/journal.pone.0066662>
- 515 Schoonmaker, J., G.W. Tribble, S.V. Smith, and F.T. Mackenzie. 1985. Geochemistry of saline  
516 ponds, Kiritimati (Republic of Kiribati). *Proceedings of the 5th International Coral Reef*  
517 *Congress*, Vol. 3, pp. 439–444.
- 518 Shen, Y., V. Thiel, J.P. Duda, and J. Reitner. 2018. Tracing the fate of steroids through a  
519 hypersaline microbial mat (Kiritimati, Kiribati/Central Pacific). *Geobiology* 16: 307–318,  
520 <https://doi.org/10.1111/gbi.12279>.
- 521 Shen, Y., V. Thiel, P. Suarez-Gonzalez, S.W. Rampen, and J. Reitner. 2020. Sterol preservation  
522 in hypersaline microbial mats. *Biogeosciences* 17: 649–666, [https://doi.org/10.5194/bg-](https://doi.org/10.5194/bg-17-649-2020)  
523 17-649-2020.
- 524 Shtukenberg, A.G., Y.O. Punin, E. Gunn, and B. Kahr. 2012. Spherulites. *Chemical Reviews*  
525 112: 1805–1838. <https://doi.org/10.1021/cr200297f>.

- 526 Siahi, M., A. Hofmann, S. Master, C.W. Mueller, and A. Gerdes. 2017. Carbonate ooids of the  
527 Mesoarchaeon Pongola Supergroup, South Africa. *Geobiology* 15: 750–766.  
528 <https://doi.org/10.1111/gbi.12249>.
- 529 Simone, L. 1981. Ooids: A review. *Earth-Science Reviews* 16: 319-355.  
530 [https://doi.org/10.1016/0012-8252\(80\)90053-7](https://doi.org/10.1016/0012-8252(80)90053-7)
- 531 Suarez-Gonzalez, P., D. Hause-Reitner, Y. Shen, N. Schäfer, and J. Reitner. 2017. The makings  
532 of a microbialite – Insights into the earliest stages of mineralization within microbial mats  
533 (Kiritimati Island, Central Pacific). *4<sup>th</sup> International Conference of Geobiology*, Wuhan,  
534 China. Abstract book, pp. 134–135.
- 535 Suarez-Gonzalez, P., M.I. Benito, I.E. Quijada, R. Mas, S. Campos-Soto. 2019. ‘Trapping and  
536 binding’: A review of the factors controlling the development of fossil agglutinated  
537 microbialites and their distribution in space and time. *Earth-Science Reviews* 194: 182–215.  
538 <https://doi.org/10.1016/j.earscirev.2019.05.007>
- 539 Suess, E., and D. Fütterer. 1972. Aragonitic ooids: experimental precipitation from seawater in  
540 the presence of humic acids. *Sedimentology* 19: 129–139. [https://doi.org/10.1111/j.1365-](https://doi.org/10.1111/j.1365-3091.1972.tb00240.x)  
541 [3091.1972.tb00240.x](https://doi.org/10.1111/j.1365-3091.1972.tb00240.x)
- 542 Teichert, C. 1970. Oolite, oolith, ooid: Discussion. *AAPG Bulletin* 54: 1748–1749.
- 543 Trichet, J., and C. Défarge. 1995. Non-biologically supported organomineralization. *Bulletin de*  
544 *l’Institut Océanographique, Monaco* 14: 203–236.
- 545 Trichet, J., C. Defarge, J. Tribble, G. Tribble, and F. Sansone. 2001. Christmas Island lagoonal  
546 lakes, models for the deposition of carbonate-evaporite-organic laminated sediments.  
547 *Sedimentary Geology* 140: 177-189. [https://doi.org/10.1016/S0037-0738\(00\)00177-9](https://doi.org/10.1016/S0037-0738(00)00177-9), 2001.
- 548 Trower, E.J., M.D. Cantine, M.L. Gomes, J.P. Grotzinger, A.H. Knoll, M.P. Lamb, U.  
549 Lingappa, S.S. O’Reilly, T.M. Present, N. Stein, J.V. Strauss, and W.W. Fischer. 2018.  
550 Active ooid growth driven by sediment transport in a high-energy shoal, Little Ambergris  
551 Cay, Turks and Caicos Islands. *Journal of Sedimentary Research* 88: 1132–1151.  
552 <http://dx.doi.org/10.2110/jsr.2018.59>.

- 553 Valencia, M.J (1977) Christmas Island (Pacific Ocean): Reconnaissance geologic observations.  
554 *Atoll Research Bulletin* 197: 1–14.
- 555 Verrechia, E.P., P. Freytet, K.E. Verrechia, and J.L. Dumont. 1995. Spherulites in calcrete  
556 laminar crusts: Biogenic CaCO<sub>3</sub> precipitation as a major contributor to crust formation.  
557 *Journal of Sedimentary Research* A65: 690–700. [https://doi.org/10.1306/D426819E-2B26-](https://doi.org/10.1306/D426819E-2B26-11D7-8648000102C1865D)  
558 [11D7-8648000102C1865D](https://doi.org/10.1306/D426819E-2B26-11D7-8648000102C1865D)
- 559 Weber, G.W. 2014. Another link between archaeology and anthropology: Virtual anthropology.  
560 *Digital Applications in Archaeology and Cultural Heritage* 1: 3–11.  
561 <http://dx.doi.org/10.1016/j.daach.2013.04.001>.
- 562 Wilkinson, B.H., B.N. Pope, and R.M. Owen. 1980. Nearshore ooid formation in a modern  
563 temperate region marl lake. *Journal of Geology* 88: 697–704.
- 564 Wilkinson, B.H., R.M. Owen, and A.R. Carroll. 1985. Submarine hydrothermal weathering,  
565 global eustasy, and carbonate polymorphism in Phanerozoic marine oolites. *Journal of*  
566 *Sedimentary Petrology* 55: 171–183.
- 567 Zwicker, J., D. Smrzka, F. Steindl, M.E. Böttcher, E. Libowitzky, S. Kiel, and J. Peckmann.  
568 2020. Mineral authigenesis within chemosynthetic microbial mats: Coated grain formation  
569 and phosphogenesis at a Cretaceous hydrocarbon seep, New Zealand. *The Depositional*  
570 *Record*. <https://doi.org/10.1002/dep2.123>  
571

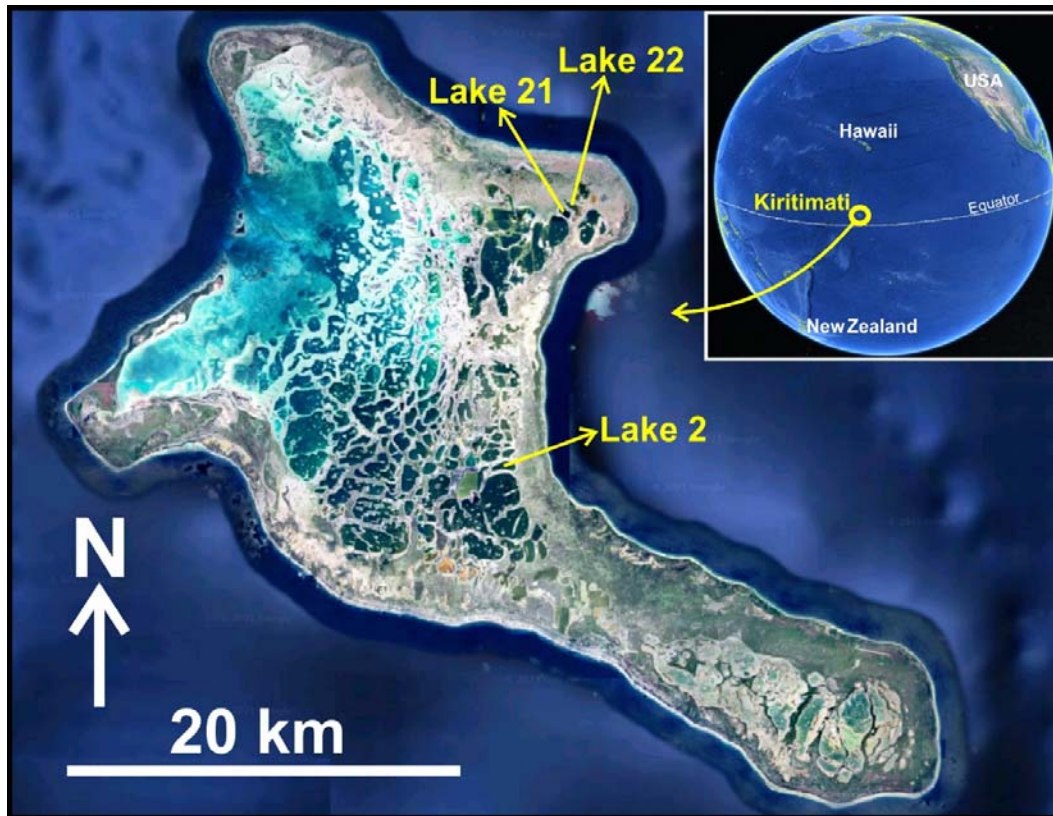

572

573 **Figure 1:** Satellite image from Google Earth of Kiritimati atoll, showing its reticulate  
574 pattern of ~500 small and shallow ponds, and highlighting those whose microbial mats have  
575 been studied here: Lakes 2, 21 and 22. Inset marks the location of Kiritimati in the central  
576 Pacific.

577

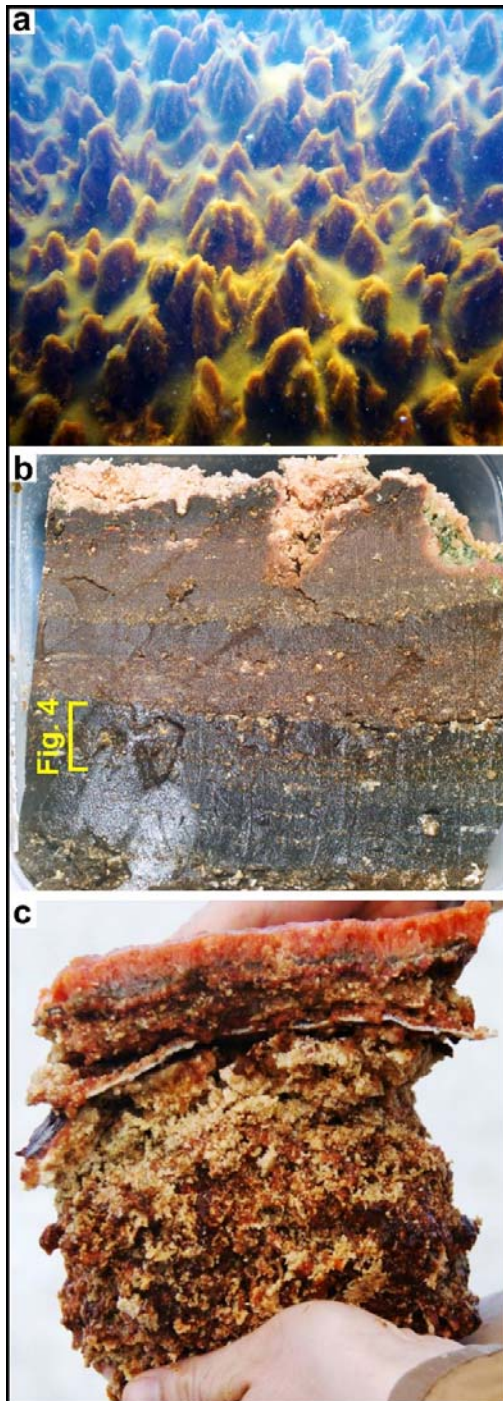

**Figure 2:** Samples studied in this work. **a** Subaqueous picture of the microbial mat covering the bottom of Lake 21, with conical protuberances, up to 10 cm tall. One of the protuberances was sampled and is studied here. **b** Freshly cut section of the microbial mat of Lake 22, ~12 cm thick, with its layers shown by colour banding. Lighter spots are mineral precipitates. The bracket marks the approximate location of the subsample whose photomicrograph is shown in Fig. 4. **c** Freshly cut section of the microbial mat of Lake 2. Note the fresh mucous exopolymers (EPS) of the photosynthetically active top layers contrasting with the lower more degraded layers. Lighter spots are mineral precipitates.

578

579



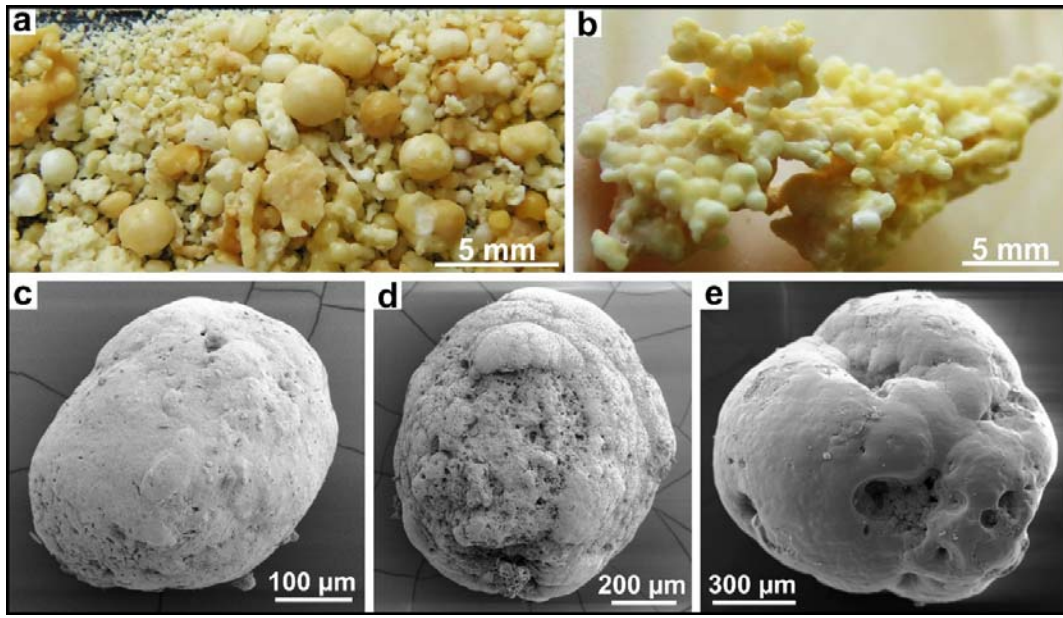

580

581 **Figure 3: a** Loose mineral precipitates from the upper part of the microbial mat of Lake 2

582 after removal of the organic matter. Note the abundance and diversity of sizes of subspherical

583 particles. **b** Centimetric irregular aggregate from the lower part of the Lake 2 mat, formed by

584 many subspherical particles merged together. **c-e** SEM images of subspherical particles,

585 showing their irregular and often pitted surface, with botryoidal or domal overgrowths that

586 cover only partially the particle. **c-d** from the Lake 21 mat, **e** from the Lake 2 mat.

587

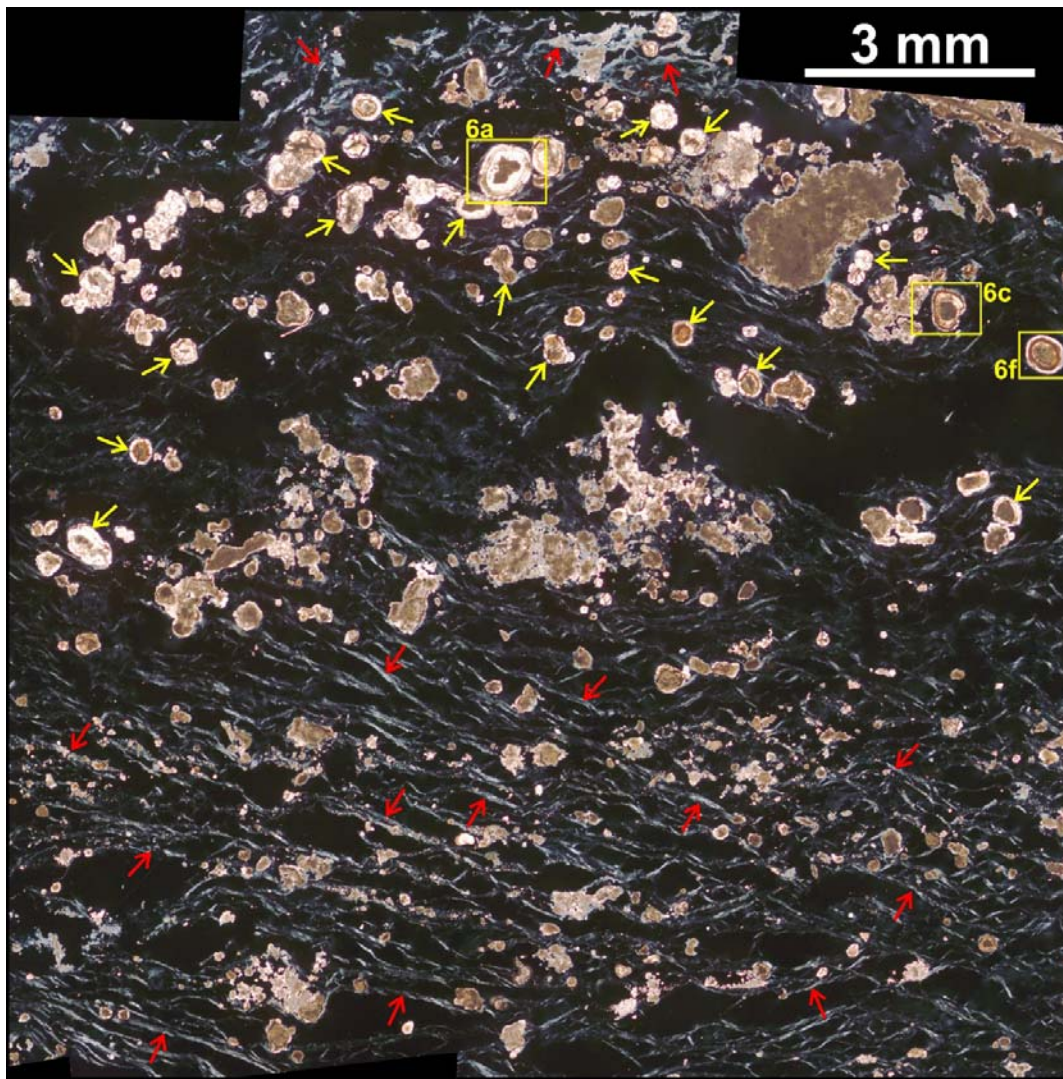

588

589 **Figure 4:** Crossed polarized light photomicrograph of a thin section from the lower  
590 middle part of the microbial mat of Lake 22 (see location in Fig. 2b). This sample includes the  
591 characteristic aragonitic precipitates of the Kiritimati mats: irregular micritic aggregates with  
592 micropeloidal texture, occurring throughout the sample, and subspherical particles (yellow  
593 arrows), occurring exclusively in a particular level. Yellow rectangles mark the location of Figs.  
594 6a, c and f. Note that the EPS matrix has a stronger birefringence (red arrows) in the levels  
595 above and below the level rich in subspherical particles. This birefringence is caused by the  
596 degradation of EPS molecules (Arp et al., 1998; 1999; Reitner et al., 2005).

597

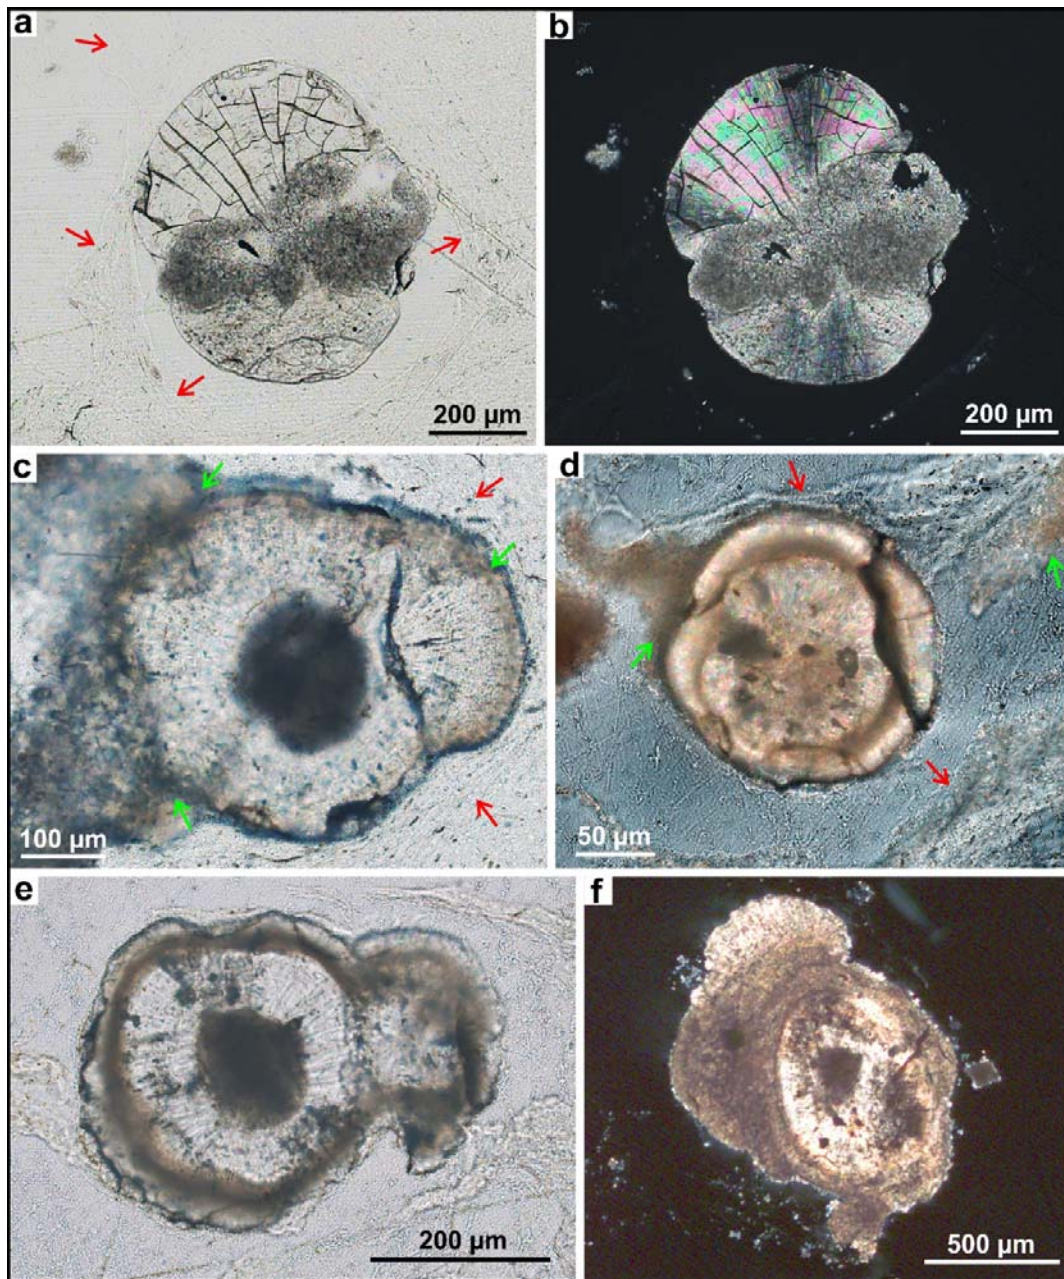

598

599

600

601

602

603

604

605

**Figure 5:** Early development stages of the Kiritimati subspherical particles. In some images the EPS matrix is slightly shrunk and detached from the particles due to the alcohol dehydration process during the preparation of thin sections (see Methods). **a** Transmitted light photomicrograph of a subspherical particle from the topmost layer of the Lake 2 mat, showing two tuft-like growths of radial fibrous aragonite above and below a nucleus of micropeloidal micrite. Red arrows point to threads of the EPS matrix surrounding the particle. **b** Same as **a** with crossed polarized light, which highlights the radial fibrous texture of the incipient cortex. **c**

606 Transmitted light photomicrograph of a subspherical particle from the Lake 21 mat, showing  
607 incipient micritic laminae (green arrows) associated with the EPS matrix surrounding the  
608 particles (red arrows). **d** Crossed polarized photomicrograph of a subspherical particle from the  
609 Lake 22 mat, showing laminated cortex and micrite precipitation (green arrows) associated with  
610 the EPS matrix surrounding the particles (red arrows). **e** Transmitted light photomicrograph of  
611 two merged subspherical particles from the Lake 22 mat, showing an incipient laminated cortex,  
612 with a second radial fibrous lamina developing over the micritic lamina. **f** Crossed polarized  
613 photomicrograph of a complex subspherical particle from the Lake 2 mat, showing tuft-like  
614 micritic and radial fibrous overgrowths that do not cover completely the particle surface.  
615

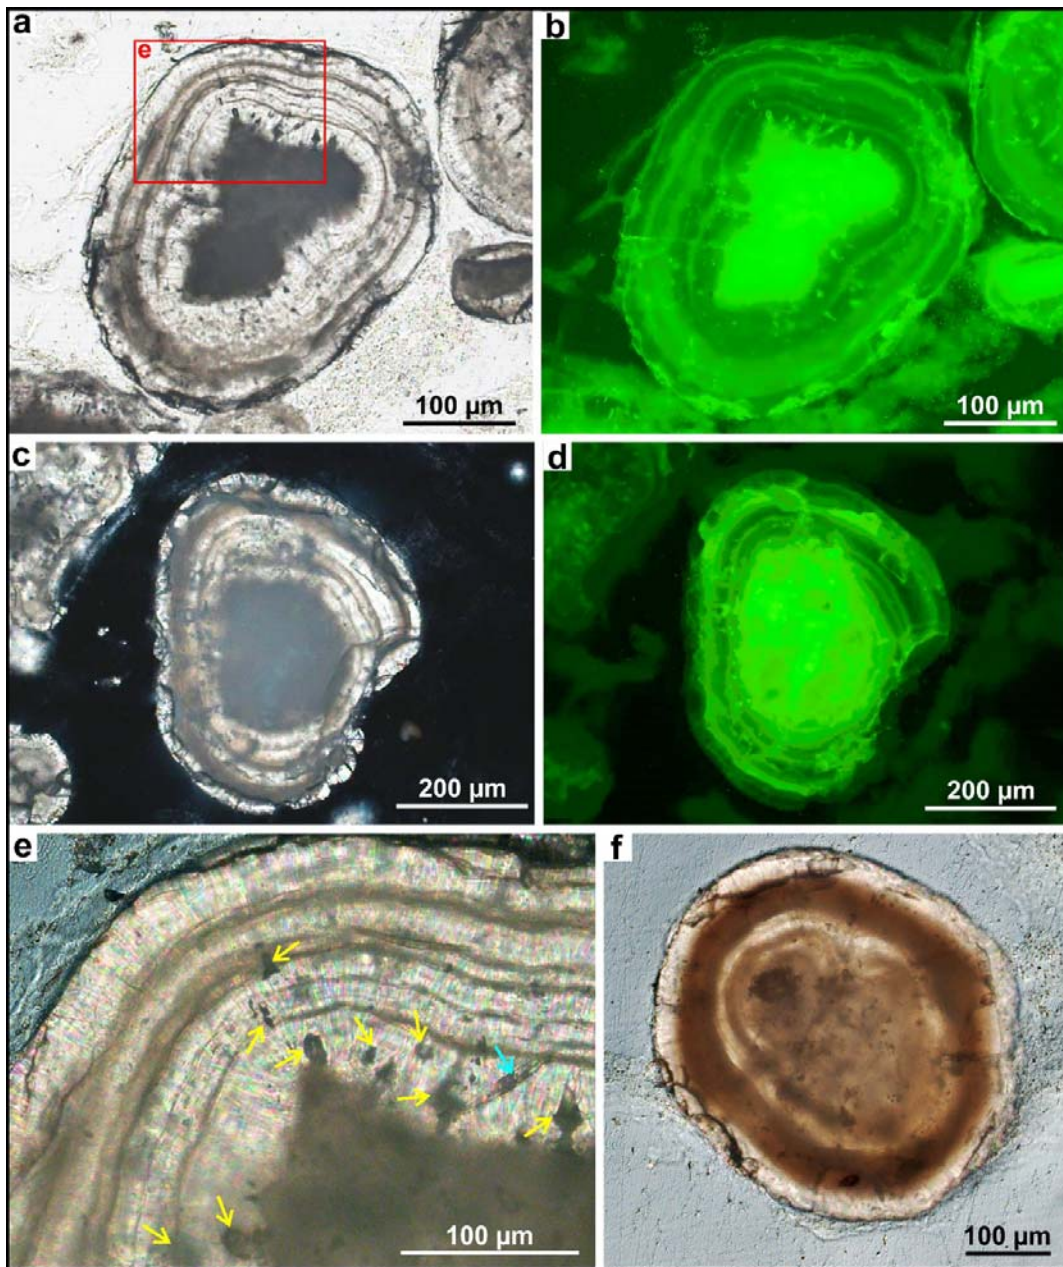

616

617 **Figure 6:** Subspherical particles with well developed laminated cortices (i.e. ooids) from

618 the Lake 22 mat (see location in Fig. 4). **a, b** Coupled transmitted light and fluorescence

619 photomicrographs of the same ooid. Red rectangle marks location of **e**. **c, d** Coupled crossed

620 polarized and fluorescence photomicrographs of the same ooid. Note in **b** and **d** the stronger

621 fluorescence of the nuclei and micritic laminae. **e** Crossed polarized photomicrograph from **a**.

622 Yellow arrows point to dark inclusions within the cortex. Compare with **b** to note the stronger

623 fluorescence of these inclusions. Blue arrow points to a diatom mold. **f** Transmitted light

624 photomicrograph of and ooid with a thicker micritic lamina.

625

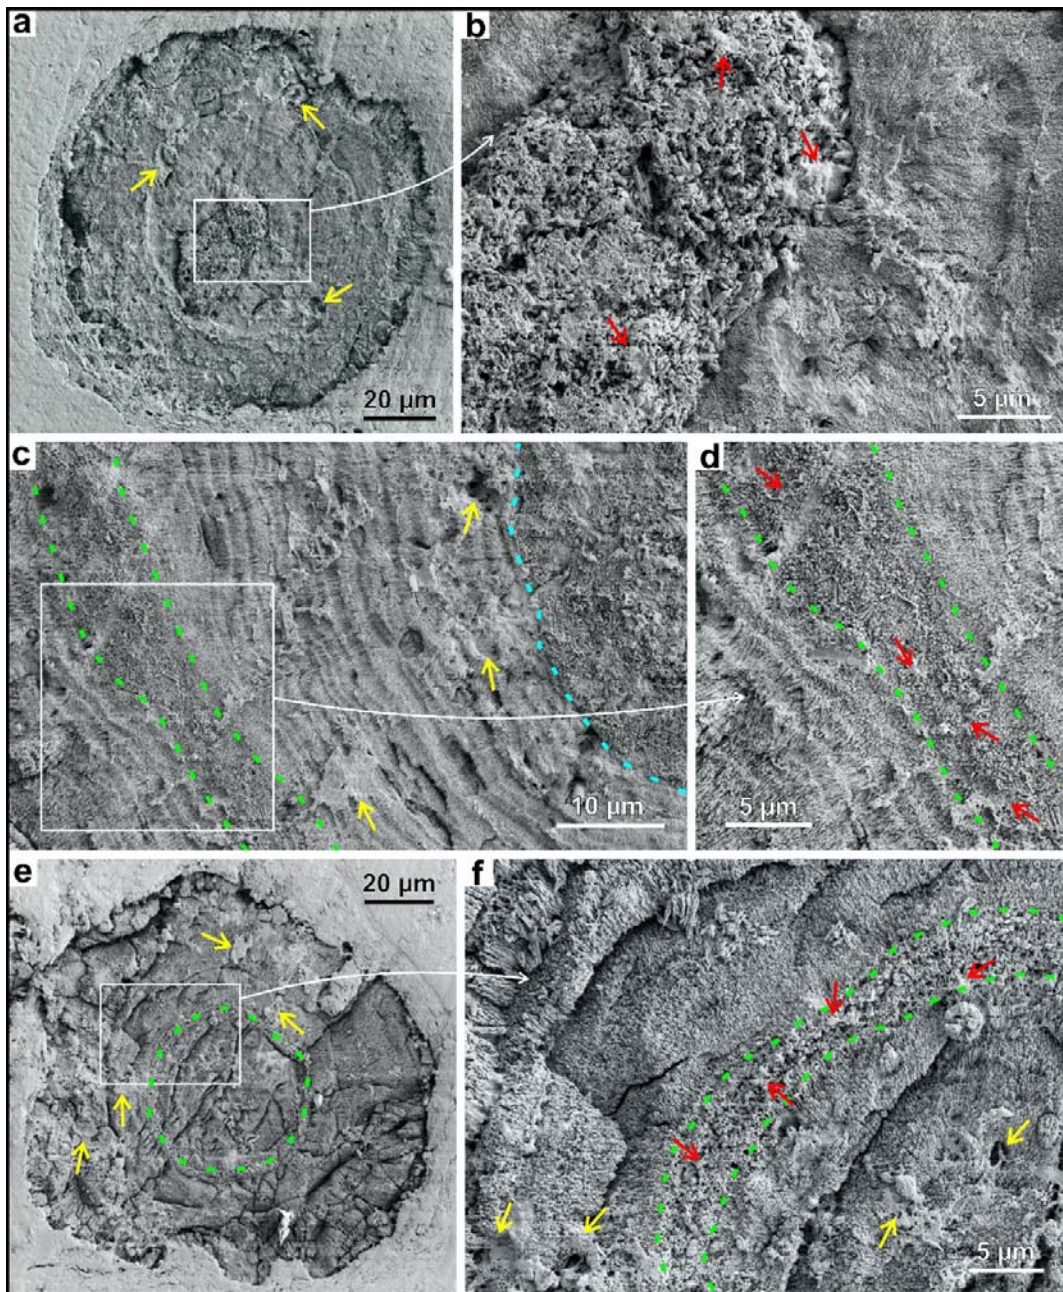

626

627 **Figure 7:** SEM pictures of EDTA-etched thin sections (see Methods) from the Lake 22  
628 mat. **a** Ooid with a strong contrast between the micritic nucleus and the cortex. Yellow arrows  
629 point to cavities in the cortex filled with EPS. **b** Detail of **a**, showing the contact between the  
630 nucleus, formed by randomly oriented aragonite crystals surrounded by abundant EPS (red  
631 arrows), and the cortex, formed by radially oriented and elongated aragonite needles. **c** Detail of  
632 an ooid with micritic nucleus (blue dashed line marks its outer boundary) and a laminated cortex  
633 with radial fibrous laminae and a micritic lamina (highlighted with green dashed line). Note the

634 finer lamination within the radial fibrous laminae. Yellow arrows point to cavities in the cortex  
635 filled with EPS. **d** Detail of **c**, showing the contrast between the radial fibrous laminae and the  
636 micritic lamina (bounded by the green dashed lines), which is composed of small and randomly  
637 oriented aragonite crystals surrounded by abundant EPS (red arrows). **e** Ooid with a micritic  
638 lamina highlighted by the green dashed line. Yellow arrows point to cavities in the cortex filled  
639 with EPS. **f** Detail of **e**, showing the contrast between the radial fibrous laminae and the micritic  
640 lamina (bounded by the green dashed lines), which is composed of small and randomly oriented  
641 aragonite crystals surrounded by abundant EPS (red arrows). Yellow arrows point to cavities in  
642 the cortex filled with EPS.  
643



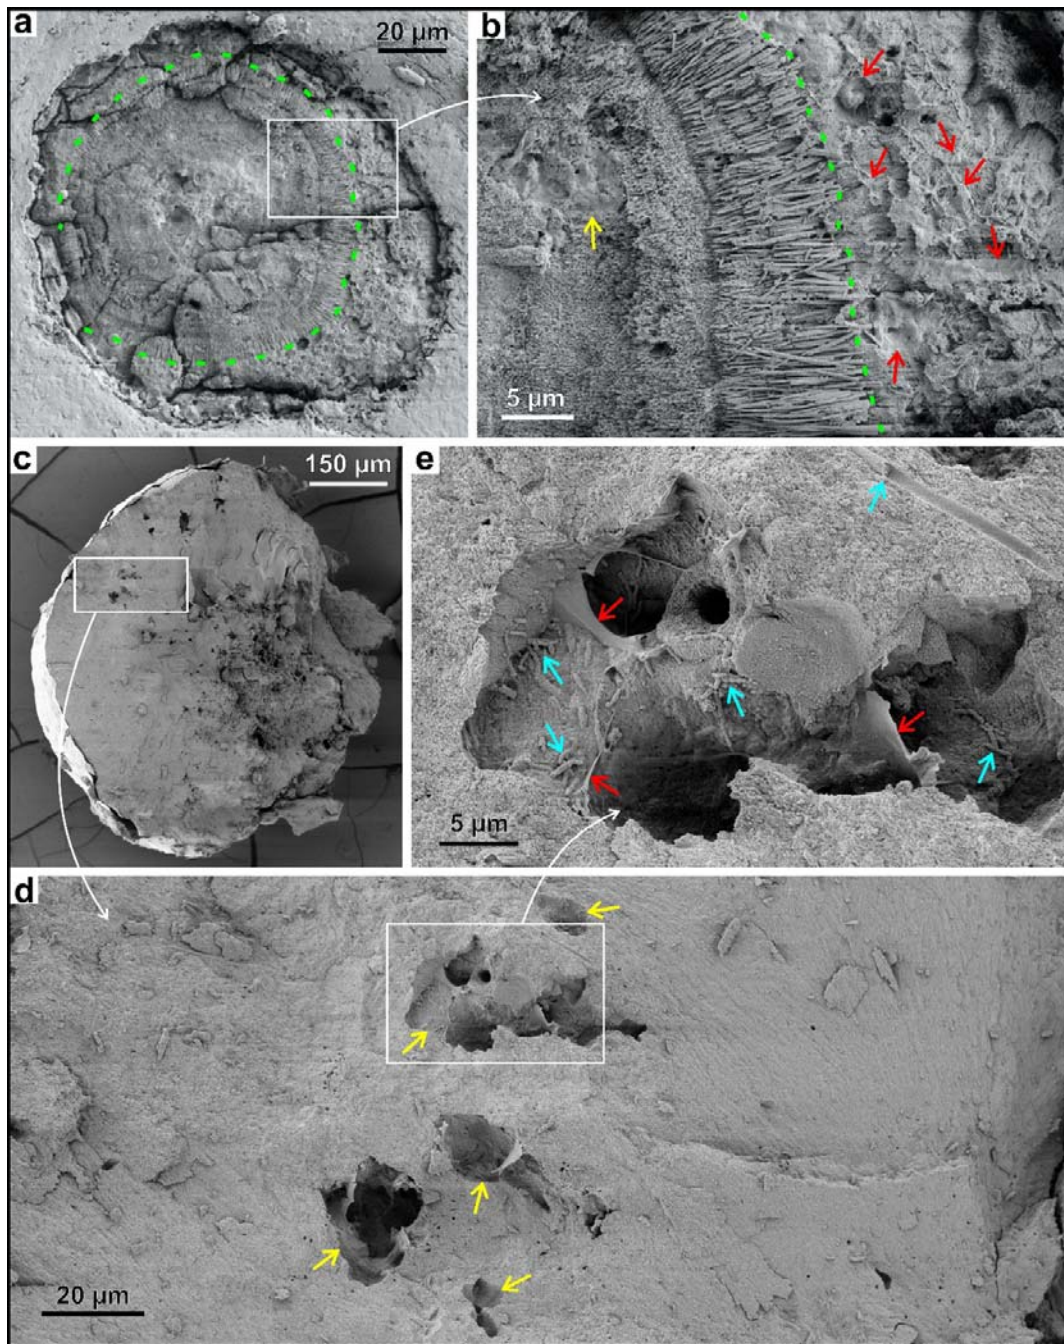

644

645 **Figure 8:** a SEM picture of an EDTA-etched thin section (see Methods) from the mat of

646 Lake 22, showing an ooid with a micritic lamina forming at its external surface. Green dashed

647 line marks the contact between the micritic lamina and the underlying radial fibrous lamina. **b**

648 Detail of **a** showing the contact (highlighted with green dashed line) between the inner radial

649 fibrous laminae and the outer micritic lamina, which is composed of small and randomly

650 oriented aragonite crystals surrounded by abundant EPS (red arrows). Yellow arrows point to

651 cavities in the cortex filled with EPS. **c** SEM picture showing the inside of a broken  
652 subspherical particle (from the mat of Lake 21), with its nucleus on the right side and the cortex  
653 on the left. **d** Detail of **c** showing several cavities in the cortex filled with EPS. **e** Detail of **d**  
654 showing the inside of one the cavities. Red arrows point to EPS inside the cavity. Blue arrows  
655 point to calcified microbe remains inside and outside the cavity.  
656
